# Supplementary material for: CuZn and ZnO Nanoflowers as Nano-Fungicides against Botrytis cinerea and Sclerotinia sclerotiorum: Phytoprotection, Translocation, and Impact after Foliar Application
Source: MDPI journal article supplement (doi:10.3390/ma14247600), 2021-12-10
Supplement: s1 [file s1]

## Article

# CuZn and ZnO Nanoflowers as Nano-Fungicides against *Botrytis cinerea* and *Sclerotinia sclerotiorum*: Phytoprotection, Translocation, and Impact after Foliar Application

Panagiota Tryfon <sup>1</sup>, Nathalie N. Kamou <sup>2</sup>, Stefanos Mourdikoudis <sup>3,4</sup>, Katerina Karamanoli <sup>5</sup>,  
Urania Menkissoglu-Spiroudi <sup>2,\*</sup> and Catherine Dendrinou-Samara <sup>1,\*</sup>

<sup>1</sup> Laboratory of Inorganic Chemistry, Department of Chemistry, Aristotle University of Thessaloniki, Thessaloniki 54124, Greece; tryfon.giota@gmail.com

<sup>2</sup> Pesticide Science Laboratory, School of Agriculture, Faculty of Agriculture Forestry and Natural Environment, Aristotle University of Thessaloniki, 54124 Thessaloniki, Greece; nnkamou@gmail.com

<sup>3</sup> Biophysics Group, Department of Physics and Astronomy, University College London, London WC1E 6BT, UK

<sup>4</sup> UCL Healthcare Biomagnetics and Nanomaterials Laboratories, 21 Albemarle Street, London W1S 4BS, UK; s.mourdikoudis@ucl.ac.uk

<sup>5</sup> Laboratory of Agricultural Chemistry, Faculty of Agriculture, Forestry and Natural Environment, Aristotle University of Thessaloniki, 54124 Thessaloniki, Greece; katkar@auth.gr

\* Correspondence: rmenkis@agro.auth.gr (UM-S.); samkat@chem.auth.gr (C.D.-S.)

**Citation:** Tryfon, P.; Kamou, N.N.; Mourdikoudis, S.; Karamanoli, K.; Menkissoglu-Spiroudi, U.; Dendrinou-Samara, C. CuZn and ZnO Nanoflowers as Nano-Fungicides against *Botrytis cinerea* and *Sclerotinia sclerotiorum*: Phytoprotection, Translocation, and Impact after Foliar Application. *Materials* **2021**, *14*, 7600. <https://doi.org/10.3390/ma14247600>

Academic Editor: Gaurav Sharma

Received: 8 November 2021

Accepted: 7 December 2021

Published: 10 December 2021

**Publisher's Note:** MDPI stays neutral with regard to jurisdictional claims in published maps and institutional affiliations.

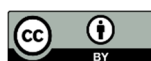

**Copyright:** © 2021 by the authors. Licensee MDPI, Basel, Switzerland. This article is an open access article distributed under the terms and conditions of the Creative Commons Attribution (CC BY) license (<http://creativecommons.org/licenses/by/4.0/>).

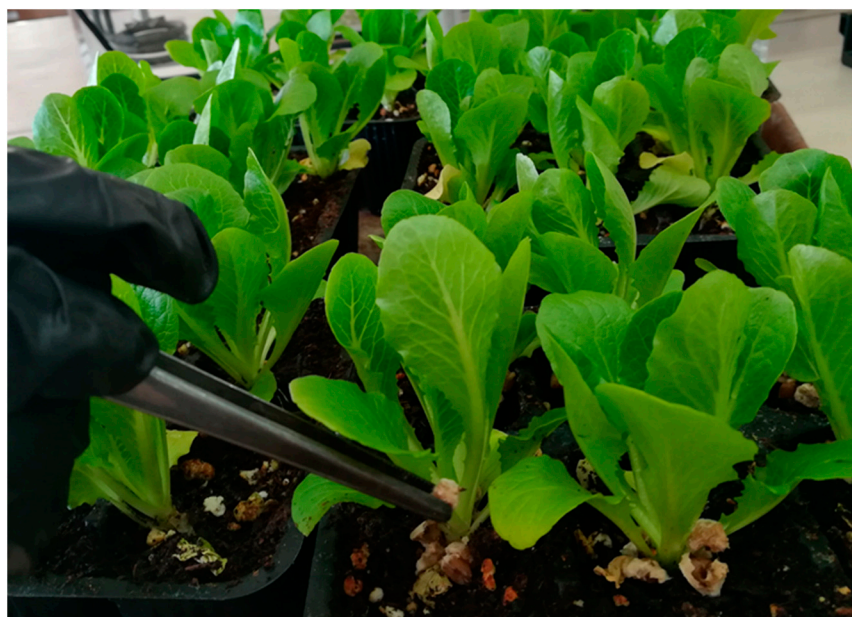

**Figure S1.** Wheat grains were putted around and next to the wounded stems of lettuce (*Lactuca sativa*) plants.

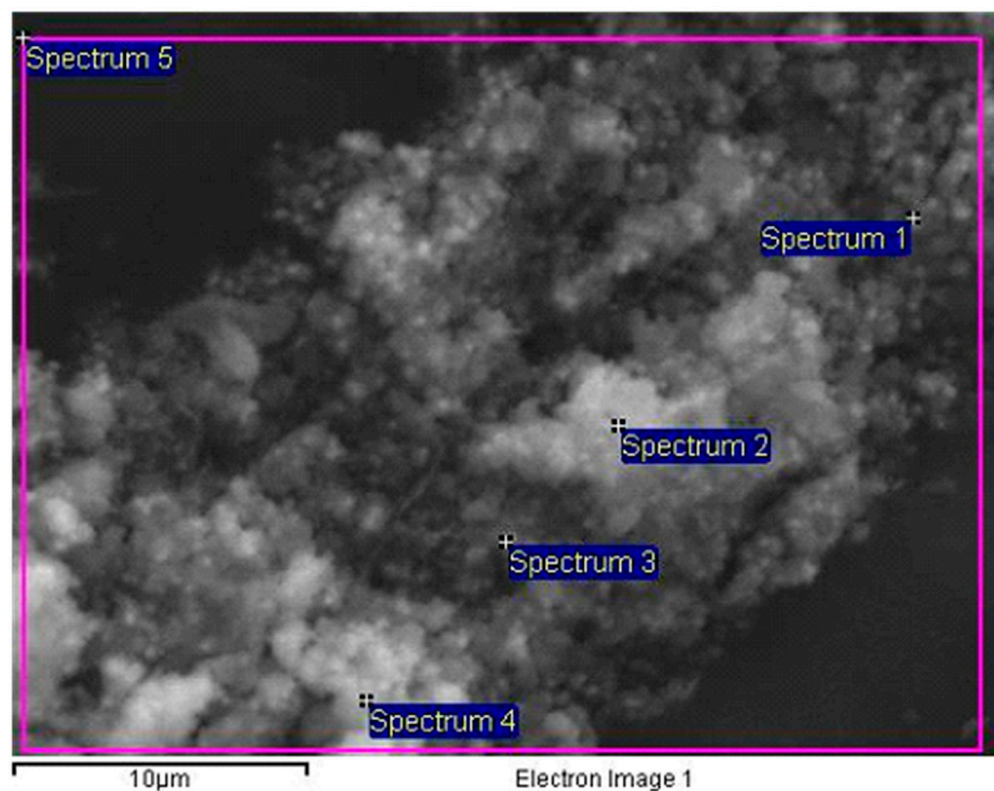

**Figure S2.** SEM image of the synthesized CuZn@DEG NFs with the five spectrum areas used for the calculation of the elemental composition by EDX.

**Table S1.** Elemental composition percentage of the CuZn@DEG NFs calculated by EDX for the spectrum areas shown in the SEM image (Figure S2).

| Spectrum | Cu     | Zn     |
|----------|--------|--------|
| 1        | 70.42% | 29.58% |
| 2        | 66.73% | 33.27% |
| 3        | 82.48% | 17.52% |
| 4        | 71.75% | 28.25% |
| 5        | 62.21% | 37.79% |
| Mean     | 70.72% | 29.28% |
| SD       | 7.55%  | 7.55   |
| Max.     | 82.48% | 37.79  |
| Min.     | 62.21% | 17.52  |

**CuZn@DEG NPs**

|                                | Size (d.nm):         | % Intensity | Width (d.nm): |
|--------------------------------|----------------------|-------------|---------------|
| <b>Z-Average (d.nm):</b> 306.4 | <b>Peak 1:</b> 190.9 | 100.0       | 38.80         |
| <b>Pdl:</b> 0.237              | <b>Peak 2:</b> 0.000 | 0.0         | 0.000         |
| <b>Intercept:</b> 0.904        | <b>Peak 3:</b> 0.000 | 0.0         | 0.000         |
| <b>Result quality : Good</b>   |                      |             |               |

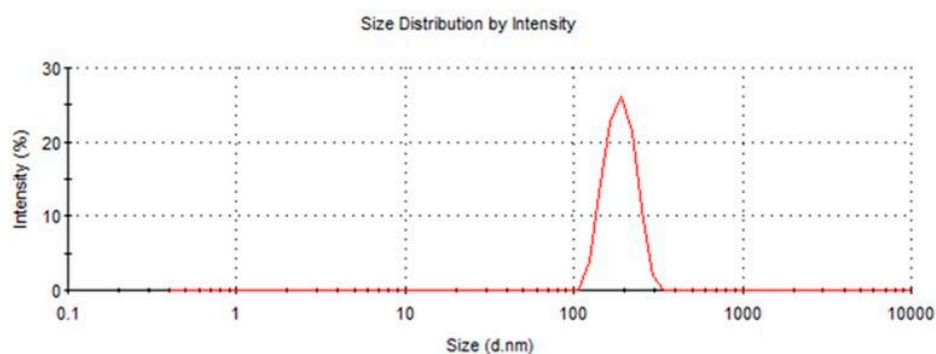**ZnO@PEG NPs**

|                                | Size (d.nm):         | % Intensity | Width (d.nm): |
|--------------------------------|----------------------|-------------|---------------|
| <b>Z-Average (d.nm):</b> 338.0 | <b>Peak 1:</b> 222.7 | 92.5        | 66.87         |
| <b>Pdl:</b> 0.402              | <b>Peak 2:</b> 74.00 | 7.5         | 12.72         |
| <b>Intercept:</b> 0.723        | <b>Peak 3:</b> 0.000 | 0.0         | 0.000         |
| <b>Result quality : Good</b>   |                      |             |               |

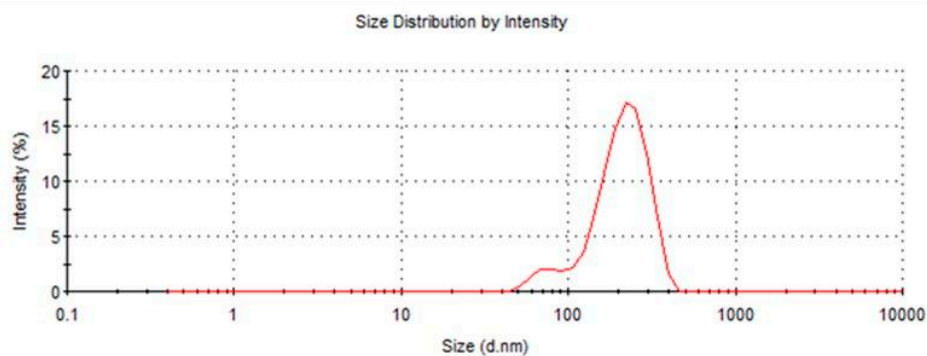

**Figure S3.** DLS measurements for CuZn@DEG and ZnO@PEG NFs.

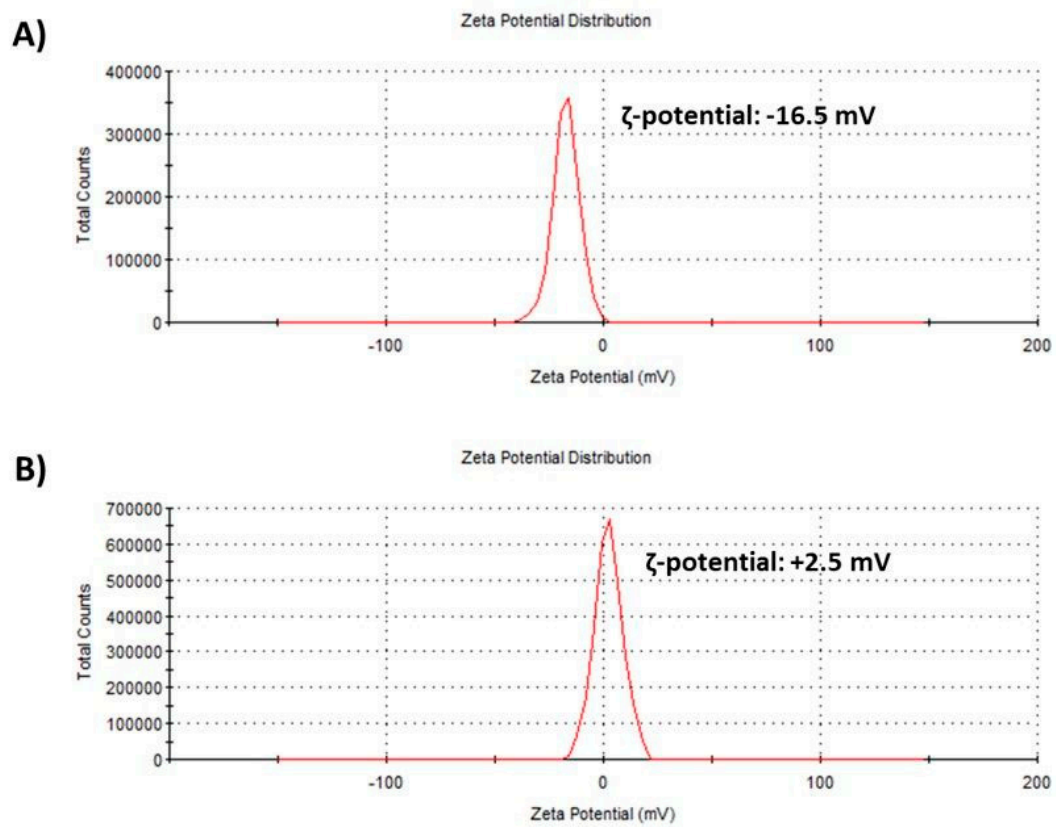

**Figure S4.**  $\zeta$ -potential for CuZn@DEG (A) and ZnO@PEG (B) NFs.

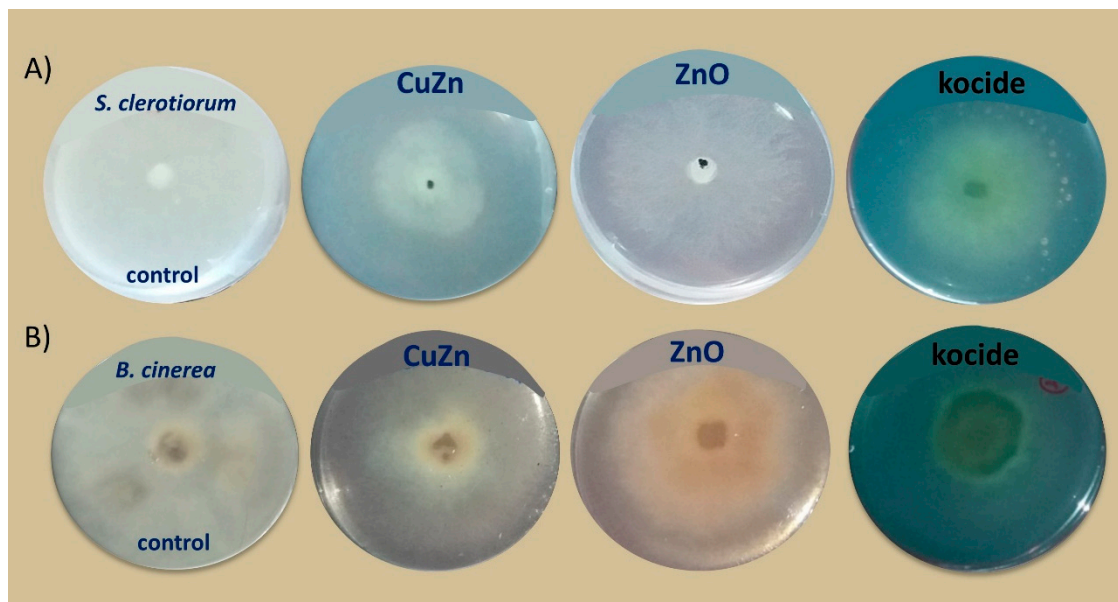

**Figure S5.** Growth inhibition of *S. sclerotiorum* after 72 h (A) and *B. cinerea* after 96 h (B) treated with CuZn@DEG NFs, ZnO@PEG NFs and KOCIDE 2000. .
